# Supplementary material
Source: PubMed Central journal article supplement (PMC4242416)
Supplement: NIHMS635553-supplement-Supplementary_Data.pdf [file NIHMS635553-supplement-Supplementary_Data.pdf]

## Supplementary Material

Table S1. Reviews on MFCs, BESs and enzymatic fuel cells published in the period 2008–2011.

---

Arechederra and Minteer 2011; Clauwaert et al. 2008; Debabov 2008; Fleming 2010; Franks and Nevin 2010; Guven et al. 2010; Hallenbeck et al. 2009; Hamelers et al. 2010; Harnisch and Schroder 2010; Haruyama 2010; Huang et al. 2011a, 2011b; Ito et al. 2010; Ivanov et al. 2010; Kannan et al. 2009; Landoulsi et al. 2011; Lee et al. 2010; Lee and Kjeang 2010; Lefebvre et al. 2011; Li et al. 2011; Liu et al. 2010; Mahadevan et al. 2011; Meunier et al. 2011; Moehlenbrock and Minteer 2008; Mohapatra et al. 2010; Namour and Jaffrezic-Renault 2010; Nealson and Finkel 2011; Ong et al. 2010; Osman et al. 2010, 2011; Pant et al. 2010; Pasco et al. 2011; Ponomareva et al. 2011; Pugh et al. 2011; Qian and Morse 2011; Rachinski et al. 2010; Ramanavicius and Ramanaviciene 2009; Rasouli and Phee 2010; Rinaldi et al. 2008; Rosenbaum et al. 2011; Rosenbaum and Schroder 2010; Rubenwolf et al. 2011; Schaetzle et al. 2008; Strik et al. 2011; Su et al. 2011; Torres et al. 2010; Vaddiraju et al. 2010; Wang et al. 2011; Wei et al. 2011; Wesley et al. 2011; Willner et al. 2009; Wrana et al. 2010; Xu and Ying 2011; Zhao et al. 2009; Zhou et al. 2011a.

---

Details of all references cited are given in the main list at the end of the review.
